# Supplementary material
Source: PubMed Central journal article supplement (PMC1736065)
Supplement: jmedgene_42_5_428__1.pdf [file jmedgene_42_5_428__1.pdf]

Fig. 4

NLS 38-43\_NLS 43-88

NES 190-197

Cytoplasmic retention 88-433

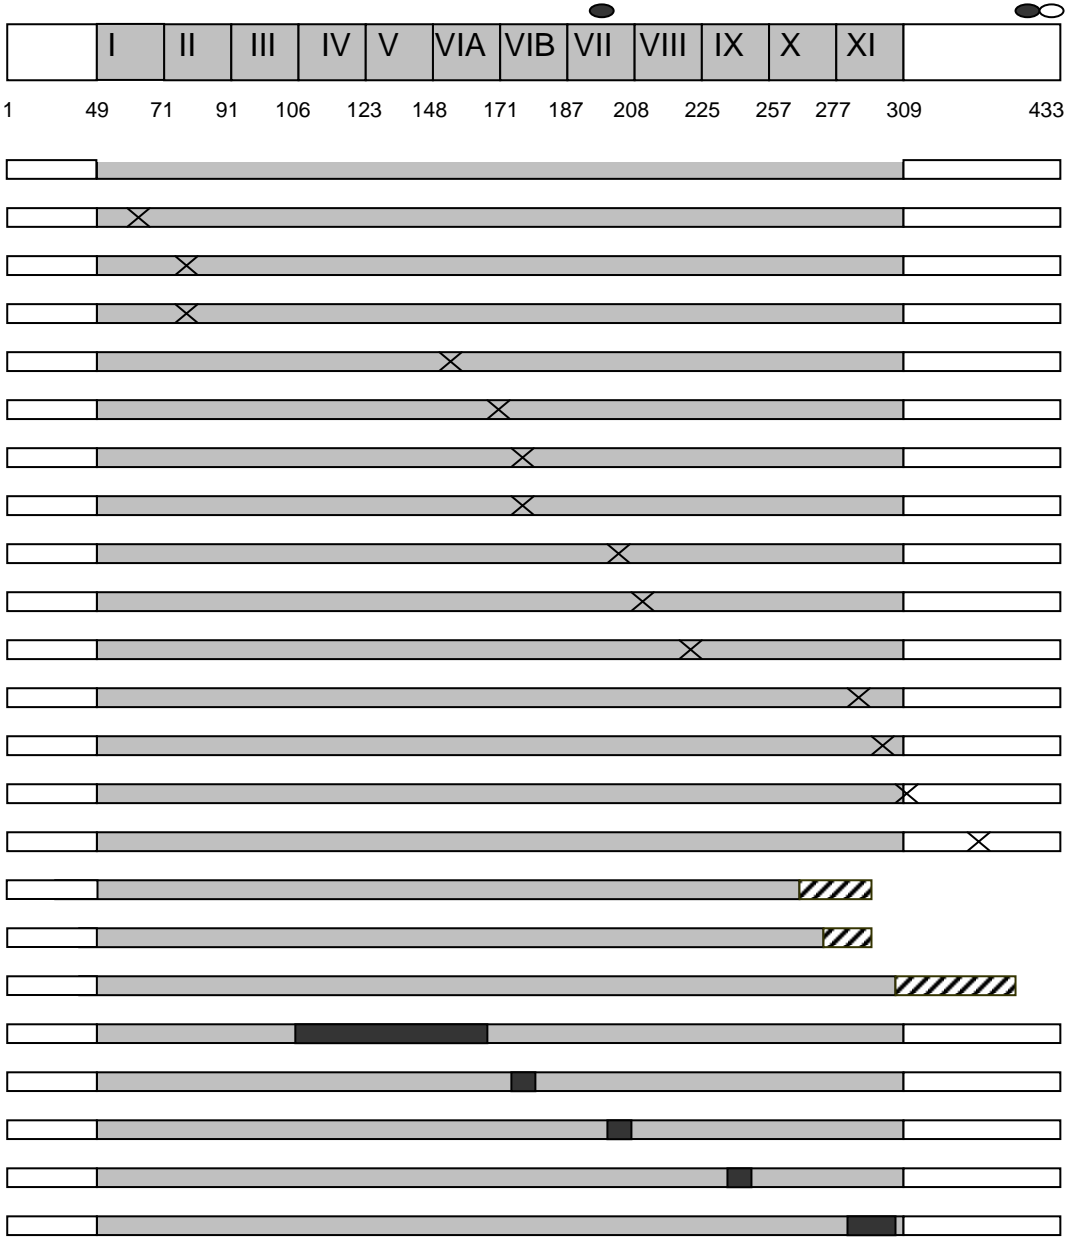

| Genotype         | kinase activity | growth suppression | subcellular protein localization | Reference   |
|------------------|-----------------|--------------------|----------------------------------|-------------|
| Wild type        | +               | +                  | N, C, M                          |             |
| Leu67Pro         | -               | ND                 | ND                               | 31,37,52    |
| Lys78Ile         | -               | ND                 | ND                               | 37,52,53    |
| Lys78Met         | -               | ND                 | N, C                             | 12          |
| Gly163Asp        | +               | -                  | N↑, C↓                           | 11,23,31    |
| Gly171Ser        | +               | ND                 | ND                               | 53          |
| Asp176Asn        | -               | -                  | N, C                             | 23,37,52    |
| Ile177Asn        | -               | -                  | N                                | 54          |
| Glu199Lys        | +               | ND                 | ND                               | 53          |
| Asp208Asn        | +               | ND                 | ND                               | 53          |
| Gly215Asp        | -               | ND                 | ND                               | 53          |
| Pro281Leu        | -               | ND                 | ND                               | 53          |
| Arg304Trp        | -               | -                  | N                                | 52,54       |
| Trp308Cys        | -               | ND                 | ND                               | 37,52       |
| Thr367Met        | +               | ND                 | ND                               | 53          |
| Leu263fs         | -               | -                  | N                                | 54          |
| Asp277fs         | -               | ND                 | N↑, C↓                           | 23          |
| Ser307fs         | -               | ND                 | ND                               | 31          |
| Glu98_Gly155del  | -               | -                  | N                                | 54          |
| Lys175_Asp176del | -               | -                  | N, C                             | 52,54       |
| Ile192_Leu195del | -               | ND                 | N↑, C↓                           | 23          |
| Asn247del        | -               | ND                 | ND                               | 51          |
| Ile303_His306del | + (-)           | -                  | N↑, C↓                           | 11,23,31,52 |
